# Supplementary material for: Exploring Patient and Provider Narratives: A Qualitative Study Identifying Barriers in Liver Transplantation Referral
Source: Research Square preprint supplement (doi:10.21203/rs.3.rs-8263977/v1), 2025-12-16
Supplement: Supplementary file 1 [file 10173ae717b39fbc76bc16ca.docx]

**Patient Interview Guide**

**General Rapport Building: Let’s start with some general questions about you and your overall health.**

1. Tell me about your daily routine. What does a typical weekday look like for you?

*Probe:* What do you like to do in your free time?

*Probe:* Who do you spend the majority of your free time with?

1. How would you describe your health in general?

*Probe:* What are some of the “healthy” things you do?

*Probe:* Who do you talk to about your health?

**Healthcare & GI Care Access: Next, I would like to talk about how easy or hard it is to obtain general healthcare when you need it.**

1. Where do you typically go to receive primary care, for example vaccination and cancer screening?

*Probe:* Do you go to different locations for different healthcare needs, for example, when you are sick? *Probe:* How often do you typically seek out healthcare?

*Probe:* How easy or hard is it for you to get healthcare when you need it? If hard: what is hard about getting healthcare? (e.g., Access, cost, lack of insurance, work or family, time to wait, time it takes, competing time demands, etc.)

1. Where do you typically go to receive care specifically for your liver disease or where have you gone before for care prior to being referred, for example for blood work, exams, and symptom management?

*Probe:* How often do you typically seek out liver disease care?

Probe: How far do you travel to see a gastroenterologist? Do you travel outside of your county?

*Probe:* How easy is it for you to access gastroenterology services in your community?

*Probe:* What, if anything, would you improve about your gastroenterology healthcare access?

**Liver Disease Knowledge: Next, I would like to ask some questions specifically related to your liver disease.**

1. Do you understand what it means to have __________? *[tailor this to the patient – cirrhosis in need of liver transplantation, or liver cancer]*

*Probe:* What does this diagnosis mean to you (i.e., how does it affect you?)

1. How informed do you think you are about your diagnosis?

*Probe:* Where do you typically receive liver disease/cirrhosis information from?

*Probe:* Where did you first learn about your diagnosis?

*Probe:* Before your diagnosis, what did you know about liver disease?

*Probe:* Did you know anyone who has had liver disease? If yes, what did they say about their condition and their treatment?

1. Do you feel like you are an active participant in your liver disease care with your provider.

*Probe:* How were your requests met? Dismissed?

*Probe:* Do you feel like your provider has your best interest at heart?

*Probe:* In what ways did you share in the decisions about your health priorities? What about your health priorities beyond physical health, such as mental health? Emotional health? Financial health? Occupational health? Social health?

*Probe:* What information do you wish you would have known? What information do you wish your doctor would have discussed with you?

*Probe:* What questions do you still have that you haven’t asked or your provider hasn’t answered?

*Probe:* Moving forward, what are some recommendations you have for liver disease education and awareness? Diagnosis? Treatment?

**Liver Transplant Knowledge, Perceptions, & Barriers: Next, I would like to ask some questions specifically related to liver transplantation.**

1. Has your provider ever spoken to you about liver transplant?

*Probe:* Has anyone other than a provider like a friend, fellow patient, family member, etc. discussed liver transplant?

*Probe:* [FOR THOSE ALREADY REFERRED]: What information did your local provider give you?

1. When in the course of your liver disease did your local GI provider being to discuss LT.

*Probe:* For example was it as soon as you were diagnosed? After a hospitalization? After blood work showed high scores? Or after you inquired?

1. What do you know about LT?
2. Are there any barriers that you feel may have delayed your referral for LT?
3. Do you feel comfortable sharing your social needs with a provider such as having trouble with transportation, changes in your diet, etc.
4. What do you know about liver transplant?

*Probe:* Is there anything that worries you?

*Probe:* Is there anything that excites you?

*Probe:* Is there anything that you are unsure of?

1. Are there any barriers you feel may keep you from receiving a referral for liver transplant?

*Probe*: Are there any barriers that you feel may keep you from making it to your first liver transplant appointment at the transplant center?

*Probe: For example, i*s it hard to find transportation, or childcare?

*Probe: Do you feel* insurance or cost may be a barrier to liver transplantation?

Probe: Would you find talking to a social worker before getting to the transplant center helpful?

*Probe:* Are there any other barriers (mental, physical, emotional, social, medical history) that you think might be barriers to liver transplantation?

1. Are there educational tools that providers could provide that would make understanding liver disease and liver transplant referral process easier?
2. Lastly, I want to show you a simple one-page tool with information about liver disease and the transplantation process.

*Probe: Do you feel like the information is easy to understand?*

*Probe: Would you use this? Would you give them to family and friends to help them understand your liver disease and the transplantation process?*

*Probe: Would you change anything? How it looks? The information provided?*

**Healthcare Provider Interview Guide**

**General Rapport Building: First, I would like to ask some general questions about your healthcare expertise and the community you work in.**

1. How would you describe your area of expertise? **[Following questions will be adjusted to their specific field/expertise]**

*Probe:* How long have you been working in this field?

1. How would you describe the community you work in?

*Probe*: How would you describe the demographic makeup of the population you serve?

*Probe*: What are some of the challenges of working in this community? Why?

*Probe*: Do you think your patients would identify similar things? Why or why not?

1. Walk me through a typical routine visit for a new patient for a patient with cirrhosis?

*Probe*: In general, what types of questions do you ask?

*Probe*: On average, how long do you spend with a new patient?

1. Walk me through a typical routine visit for a new patient for a patient with hepatocellular carcinoma?

*Probe*: In general, what types of questions do you ask?

*Probe*: On average, how long do you spend with a new patient?

**Liver Transplant Education: Next, I would like to ask some questions specifically related to LT education.**

1. Tell me about the type of information you provide patients about liver transplantation.

*Probe:* What kinds of questions do you typically receive when communicating this information?

*Probe*: What are the common misconceptions about liver transplantation that you address?

*Probe:* Where do patients find information about liver transplantation?

*Probe:* What kind of educational information does your practice provide patients to educate them about liver transplantation?

*Probe:* In your opinion, is the information provided understandable to patients?

*Probe:* When do you think is the ideal time to provide this information?

**Liver Transplant Referral: Next, I would like to ask some questions specifically related to liver transplant referral.**

1. What is your current process for referring patients for liver transplantation?
2. How do you decide when to refer patients for a liver transplant

*Probe:* What types of factors influence your decision?

*Probe:* Would you refer someone with less than 6 months of sobriety from alcohol? Why or why not?

*Probe:* Would you refer someone with a MELD score of 13 and ascites needing regular paracentesis? Why or why not?

*Probe:* When do you think it is the optimal time to refer a patient with end-stage liver disease for liver transplantation? What about hepatocellular carcinoma?

*Probe:* Do you currently use any tools or resources to support your decision to refer for liver transplantation?

1. What are the current barriers that keep you from referring a patient for a liver transplantation?

*Probe:* What is the most challenging part of discussing liver transplant with your patients?

*Probe:* Are there health system barriers that keep you from referring patients?

*Probe:* Are there specific patient barriers?

1. Do your patients typically live in the area near a transplant center?

*Probe:* How far would you say your patients travel to the transplant center?

*Probe:* How long does a patient typically have to wait to get a transplant evaluation appointment?

6. What would you like to see done to improve access to liver transplantation?

*Probe:* What interventions would you suggest?
